# Supplementary material for: Renal Genetics Clinic: 3-Year Experience in the Cleveland Clinic
Source: PubMed Central journal article supplement — Kidney Med. 2022 Dec 13;5(2):100585. doi: 10.1016/j.xkme.2022.100585 (PMC9874141; doi:10.1016/j.xkme.2022.100585), 2022-12-13
Supplement: mmc1.pdf [file mmc1.pdf]

Table S1. Monogenic disorders identified at the renal genetics clinic

| <b>Gene(s)</b>     | <b>OMIM#</b>   | <b>Number of patients</b> |
|--------------------|----------------|---------------------------|
| PKD1               | 601313         | 22                        |
| ALPL               | 171760         | 10                        |
| COL4A5             | 303630         | 9                         |
| COL4A4             | 120131         | 10                        |
| COL4A3             | 120070         | 8                         |
| CASR               | 601199         | 4                         |
| SLC12A3            | 600968         | 3                         |
| GLA                | 300644         | 3                         |
| CFHR1              | 134371         | 2                         |
| PKD2               | 173910         | 3                         |
| CLCNKB             | 602023         | 2                         |
| TSC2               | 191092         | 2                         |
| CFHR1 and CFHR3    | 134371, 605336 | 2                         |
| CYP24A1            | 126065         | 2                         |
| SLC34A1            | 182309         | 1                         |
| BCHE               | 177400         | 1                         |
| PCNT               | 170285         | 1                         |
| ACTN4              | 604638         | 1                         |
| C3                 | 120700         | 1                         |
| LCAT               | 606967         | 1                         |
| Apo-A1             | 107680         | 1                         |
| LMX1B              | 602575         | 1                         |
| NR4A2              | 601828         | 1                         |
| EYA1               | 601653         | 1                         |
| PBX1               | 176310         | 1                         |
| BCOR               | 300485         | 1                         |
| PHEX               | 300550         | 1                         |
| COL3A1             | 120180         | 1                         |
| PKHD1              | 606702         | 1                         |
| SCN1A              | 182389         | 1                         |
| TSEN54             | 608755         | 1                         |
| SCL22A5            | 603377         | 1                         |
| 22q11.2 deletion   | 611867         | 1                         |
| CD46               | 120920         | 1                         |
| INF2               | 610982         | 2                         |
| SLC5A2             | 182381         | 1                         |
| KMT2D              | 602113         | 1                         |
| UMOD               | 191845         | 1                         |
| HNF1B              | 189907         | 2                         |
| PAX2               | 167409         | 2                         |
| NSD1               | 606681         | 1                         |
| MT-TL1             | 604052         | 1                         |
| <b>Grand Total</b> |                | <b>115</b>                |
